# Supplementary material for: PdMo bimetallene nanozymes for photothermally enhanced antibacterial therapy and accelerated wound healing
Source: Royal Society of Chemistry journal article supplement (doi:10.1039/d3dt03446a), 2023-11-29
Supplement: d3dt03446a1.pdf [file d3dt03446a1.pdf]

## Supporting Information

### **PdMo bimetallic nanozyme for photothermal-enhanced antibacterial therapy and accelerated wound healing**

Wei Zhou<sup>a,1</sup>, Na Li<sup>a,1</sup>, Minghui Wang<sup>a</sup>, Peixian Wu<sup>a</sup>, Qian Fu<sup>a</sup>, Wenjie Wang<sup>a</sup>, Zheng Liu<sup>a</sup>, Shuiyuan He<sup>a</sup>, MengYu Zhou<sup>a</sup>, Dan, Song<sup>a</sup>, Jie Chen<sup>a</sup>, Nanyun Lin<sup>a</sup>, Yingying Wu<sup>a</sup>, Lei Jiao<sup>b\*</sup>, Xiaofeng Tan<sup>a\*</sup>, and Qinglai Yang<sup>a\*</sup>

<sup>a</sup> Center for Molecular Imaging Probe, Hunan Province Key Laboratory of Tumor Cellular and Molecular Pathology, Cancer Research Institute, Hengyang Medical School, University of South China, Hengyang, Hunan 421001, China.

<sup>b</sup> Institute of Molecular Metrics, College of Chemistry and Chemical Engineering, Qingdao University, Qingdao, 266071, China.

<sup>1</sup> These authors contributed equally to this work.

\* Corresponding authors:

Dr. Lei Jiao (E-mail: [jiaolei@qdu.edu.cn](mailto:jiaolei@qdu.edu.cn)), Dr. Xiaofeng Tan (E-mail: [tanxiaofeng@usc.edu.cn](mailto:tanxiaofeng@usc.edu.cn)), Dr. Qinglai Yang (E-mail: [qingyu513@usc.edu.cn](mailto:qingyu513@usc.edu.cn)).

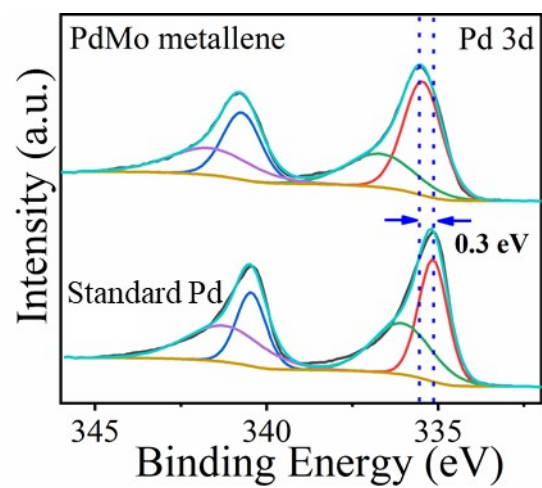

Figure S1 the XPS spectra of Pd 3d for the PdMo bimetallic and standard Pd

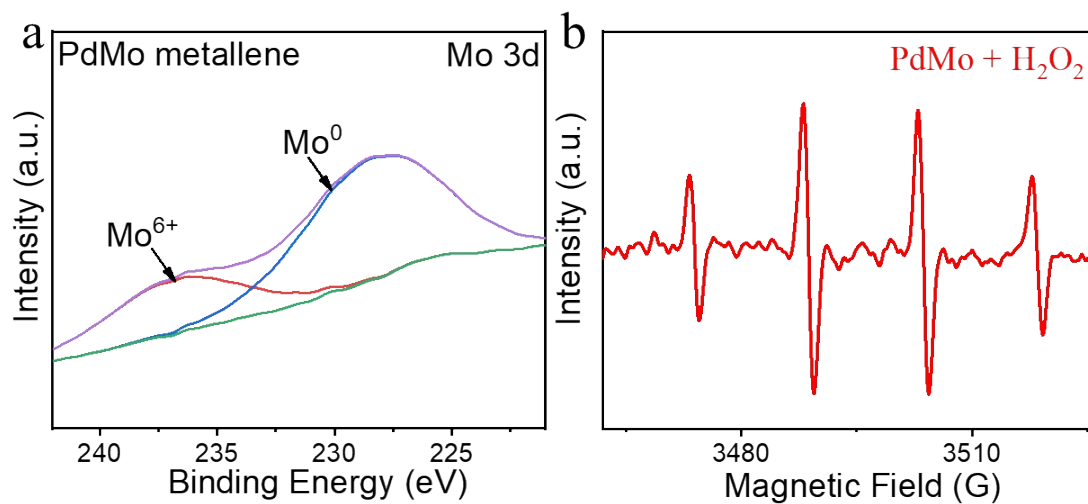

Figure S2 the XPS spectra of Mo 3d for the PdMo bimetallic (a), the EPR spectra of PdMo bimetallic + H<sub>2</sub>O<sub>2</sub>

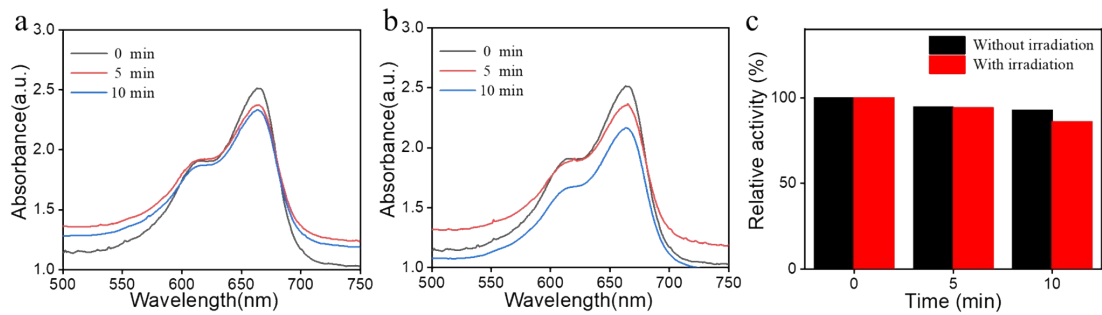

Figure S3 Time-dependent degradation spectra of MB without laser irradiation (a) and with laser irradiation (b). The comparison of relative activity between laser irradiation and control group for PdMo bimetallic + MB + H<sub>2</sub>O<sub>2</sub> (c).

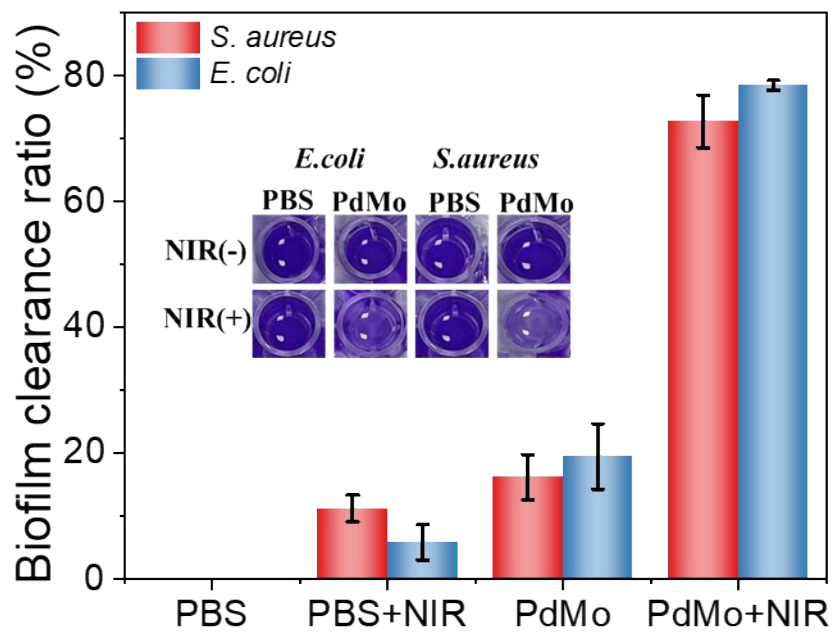

Figure S4 Biofilm eradication ratio of *S. aureus* and *E. coli* in the presence of PBS and PdMo bimetallic with or without laser irradiation.

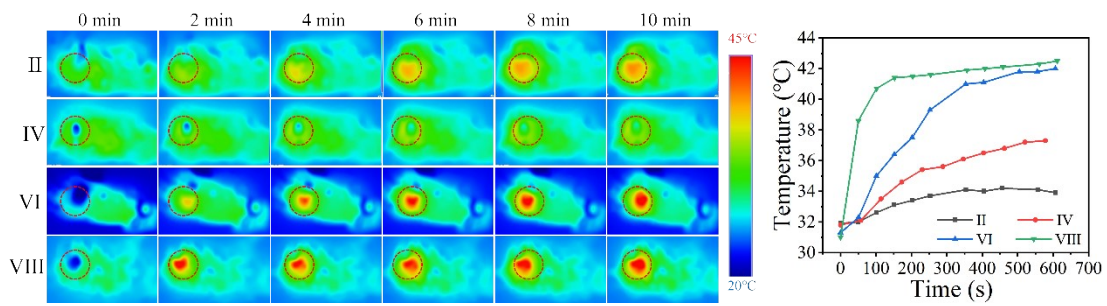

Figure S5. Representative thermal images and heating curves of mice with different treatments (Control, H<sub>2</sub>O<sub>2</sub>, PdMo bimetallic, and PdMo bimetallic + H<sub>2</sub>O<sub>2</sub>).

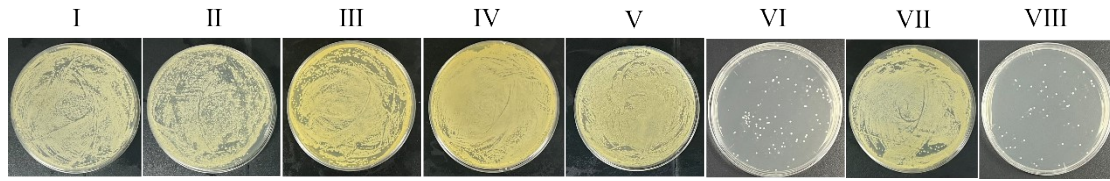

Figure S6. Representative photographs of bacterial culture from the skin tissues of mice wounds infected with *S.aureus* in eight different treatment groups (Control; Control + NIR;  $H_2O_2$ ;  $H_2O_2$  + NIR; PdMo; PdMo+NIR; PdMo+  $H_2O_2$  and PdMo+  $H_2O_2$  + NIR) after the 10th day of treatment.

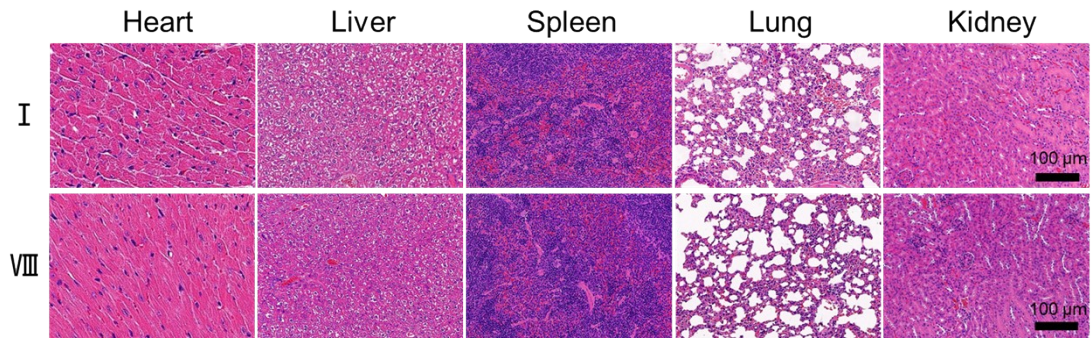

Figure S7. Histological photographs of the heart, liver, spleen, lung, and kidney of the *S.aureus* infected mice after being treated by different treatments for 10 days, respectively. The scale bars are 100 µm.



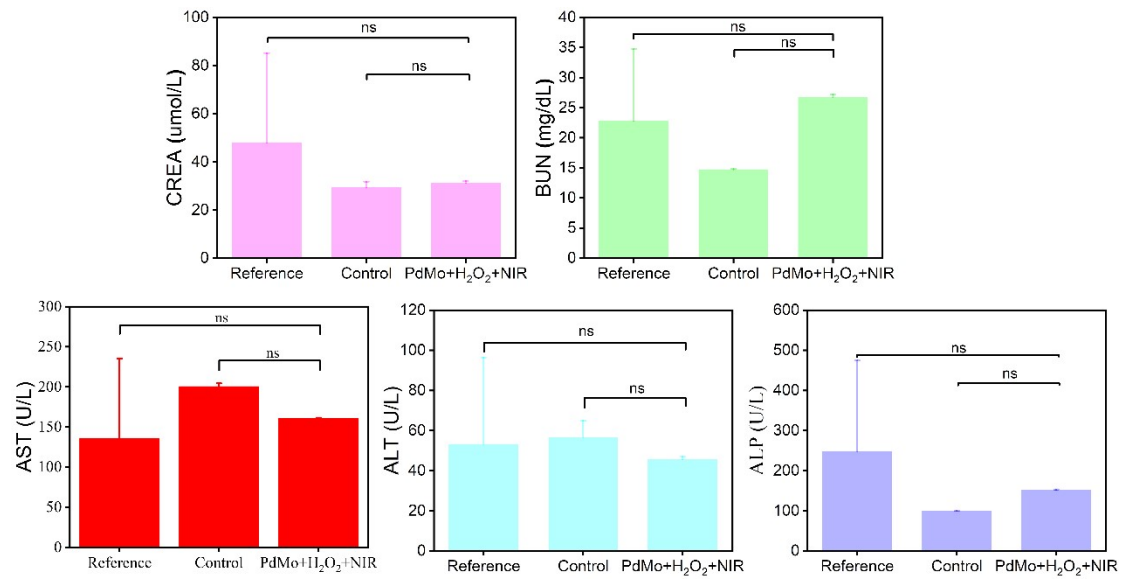

Figure S8. The biochemical indicators of mice in the I and VIII groups 10 days after administration.

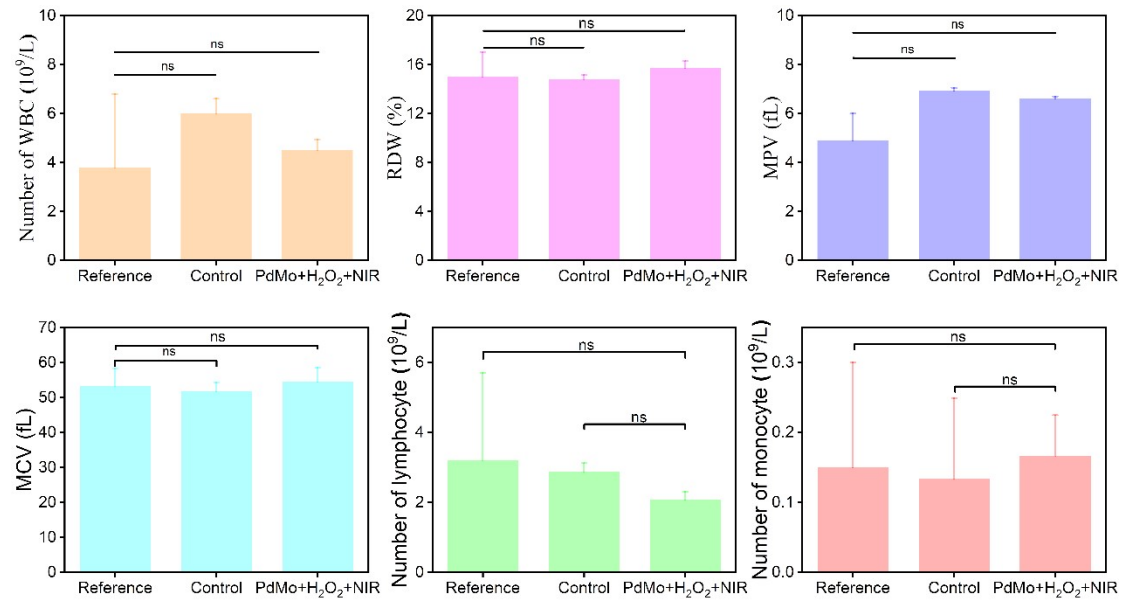

Figure S9. The routine blood analysis of mice in the I and VIII groups 10 days after administration

Table S1 the Comparison of the kinetic parameters between PdMo bimetalloenes and other POD-like nanozymes

| Catalyst                    | Substrate                     | $K_m$ (mM) | $V_{max}$ ( $10^{-8}Ms^{-1}$ ) | Reference |
|-----------------------------|-------------------------------|------------|--------------------------------|-----------|
| PdMo bimetalloene           | H <sub>2</sub> O <sub>2</sub> | 0.26       | 12.50                          | This work |
| HRP                         | H <sub>2</sub> O <sub>2</sub> | 3.70       | 8.71                           | [1]       |
| PdIr <sub>0.5</sub> aerogel | H <sub>2</sub> O <sub>2</sub> | 2.40       | 53.40                          | [2]       |
| B, N-PdRu aerogel           | H <sub>2</sub> O <sub>2</sub> | 4.97       | 3.29                           | [3]       |
| Pd/NiCl <sub>2</sub>        | H <sub>2</sub> O <sub>2</sub> | 1.08       | 4.38                           | [4]       |
| Pt/Ag NPs                   | H <sub>2</sub> O <sub>2</sub> | 3.5        | 1.59                           | [5]       |

## References

- [1] Konglin Wu, Dongdong Zhu, Xingliang Dai, Wannan Wang, Xiaoyan Zhong, Zhaobin Fang, Cheng Peng, Xianwen Wei, Haisheng Qian, Xulin Chen, Xianwen Wang, Zhengbao Zha, Liang Cheng. Bimetallic Oxide Cu<sub>1.5</sub>Mn<sub>1.5</sub>O<sub>4</sub> Cage-Like Frame Nanospheres with Triple Enzyme-Like Activities for Bacterial-Infected Wound Therapy. *Nano Today* **2022**, *43*. DOI: 10.1016/j.nantod.2022.101380.
- [2] X. Tan, Q. Yang, X. Sun, P. Sun, H. Li. Pdir Aerogels with Boosted Peroxidase-Like Activity for a Sensitive Total Antioxidant Capacity Colorimetric Bioassay. *ACS Appl Mater Interfaces* **2022**, *14* (8), 10047-10054. DOI: 10.1021/acscami.1c22625.
- [3] Y. Zeng, Y. Li, X. Tan, J. Gong, Z. Wang, Y. An, Z. Wang, H. Li. B,N-Doped Pdir Aerogels as High-Performance Peroxidase Mimics for Sensitive Detection of Glucose. *ACS Appl Mater Interfaces* **2021**, *13* (31), 36816-36823. DOI: 10.1021/acscami.1c07987.
- [4] Shuangfei Cai, Xueliang Liu, Qiusen Han, Cui Qi, Rong Yang, Chen Wang. A Novel Strategy to Construct Supported Pd Nanocomposites with Synergistically Enhanced Catalytic Performances. *Nano Research* **2018**, *11* (6), 3272-3281. DOI: 10.1007/s12274-017-1868-9.
- [5] Shuangfei Cai, Xinghang Jia, Qiusen Han, Xiyun Yan, Rong Yang, Chen Wang. Porous Pt/Ag Nanoparticles with Excellent Multifunctional Enzyme Mimic Activities and Antibacterial Effects. *Nano Research* **2017**, *10* (6), 2056-2069. DOI: 10.1007/s12274-016-1395-0.
